# Supplementary material for: Identification of novel MITEs (miniature inverted-repeat transposable elements) in Coxiella burnetii: implications for protein and small RNA evolution
Source: PubMed Central journal article supplement (PMC5896051; doi:10.1186/s12864-018-4608-y), 2018-04-11
Supplement: 12864_2018_4608_MOESM5_ESM.pdf [file 12864_2018_4608_MOESM5_ESM.pdf]

|               |      |         |               |           |         |         |              |         |           |        |       |             |       |                              |       |         |       |              |           |   |           |
|---------------|------|---------|---------------|-----------|---------|---------|--------------|---------|-----------|--------|-------|-------------|-------|------------------------------|-------|---------|-------|--------------|-----------|---|-----------|
|               | 1    | 10      | 20            | 30        | 40      | 50      | 60           | 70      | 80        | 90     | 100   | 110         | 120   | 130                          | 141   |         |       |              |           |   |           |
| 1. CBU_1843a  |      |         |               | MTVKLMLS  | --FALL  | SKLLD   | TTGTYHYPPHPW | -----   | -----     | -----  | ----- | RSVKNLKP    | VVLPR | RLRLLYY                      |       |         |       |              |           |   |           |
| 2. CBU_0434a  | MVKT | KNLKPVI | PVQAPRRQLKHKT | LMTVKLMLS | --FAFFL | SKLLD   | TTGTPSHYPSA  | -----   | -----     | -----  | ----- | VKPEKLP     | VVLPR | RLRLLYY                      |       |         |       |              |           |   |           |
| 3. CBU_1323a  |      |         |               | MTSAVKVLD | SLSV    | RRPTHG  | -----        | -----   | -----     | -----  | ----- | NDGHFFNYL   | I     | FPL                          |       |         |       |              |           |   |           |
| 4. CBU_0434   |      |         |               | MTSAVKALD | SLSI    | RRPAHG  | -----        | -----   | -----     | -----  | ----- | NDGHFFNYL   | I     | FPLYLAPLS                    |       |         |       |              |           |   |           |
| 5. CBU_0312a  |      |         |               | MTSAVKALD | SLSI    | RRPTHG  | -----        | -----   | -----     | -----  | ----- | NDGHFFNYL   | I     | FPLYLAPLS                    |       |         |       |              |           |   |           |
| 6. CBU_1948   |      |         |               | MTSAVKALD | SLSI    | RRPTHG  | -----        | -----   | -----     | -----  | ----- | NDGHFFNYL   | I     | FPLYLALLVDAYAPARARRGAGMAGFKF |       |         |       |              |           |   |           |
| 7. CBU_0510a  |      |         |               | MTSAVKALD | SLSI    | RRPTHG  | -----        | -----   | -----     | -----  | ----- | NDGHFFNYL   | I     | VPLCLALLS                    |       |         |       |              |           |   |           |
| 8. CBU_1894   | MFFK | PLL     | LAGIPV        | TSAVKALD  | SLSID   | RRPTHG  | -----        | -----   | -----     | -----  | ----- | NDGHFSNYL   | I     | PSLPHSLKLT                   | PMRLR | GDD     | L     |              |           |   |           |
| 9. CBU_1177   |      |         |               | MTSAVKALD | SFSI    | RRPTHG  | -----        | -----   | -----     | -----  | ----- | NDGHFFNYL   | I     | PFLPCS                       | LKLT  | PMRAGG  | DP    | PAHTCAARRRRA |           |   |           |
| 10. CBU_1911  |      |         |               | MTSAVKALD | SLSI    | RRPTHG  | -----        | -----   | -----     | -----  | ----- | NDGHFFQLLDI | P     | SLPR                         | LS    |         |       |              |           |   |           |
| 11. CBU_1186b | MSPY | FASLHT  | GYLLK         | --TTFNR   | TRAF    | AEIM    | ISAKR        | -----   | -----     | -----  | ----- | -----       | ----- | -----                        | LRKAP | SVFF    | LT    | P            |           |   |           |
| 12. CBU_1279a |      |         |               | MVNREK    | LK      | --TRRPP | PARSCAVL     | KNTK    | PSRPSR    | -----  | ----- | EDG         | DF    | STTL                         |       |         |       |              |           |   |           |
| 13. CBU_1161  | MQR  | I       | PTITH         | PPWKREK   | LK      | --TRRPP | SARPS        | VILK    | NTKPSRPSR | -----  | ----- | EDP         |       |                              |       |         |       |              |           |   |           |
| 14. CBU_0032  |      |         |               | MKREK     | LK      | --TRRPP | PARPSAVL     | LKNTK   | PSRPSR    | SGIQTK | ILRK  | TPLAFFK     | P     | LLAWI                        | PVTS  | SAVKALD | SLFV  | RRPTHG       | NDGHFFNSL | I | FPLYLALLS |
| 15. CBU_0537  |      |         |               | MVKEK     | LK      | --TRRPP | SARPSAVL     | LKDTK   | PSRPSR    | -----  | ----- | EDP         |       |                              |       |         |       |              |           |   |           |
| 16. CBU_1934a |      |         |               | MVK       | E       | LK      | --TRRPP      | TRPSAVI | LKNTK     | PSRPSR | ----- | EDP         |       |                              |       |         |       |              |           |   |           |
| 17. CBU_0149  |      |         |               | MKREK     | LK      | --TRRL  | PARPSAVL     | LKNTK   | P         | H      | RV    | -----       | RTQ   | I                            | KGLR  | K       | TPMAL | F            | LAF       |   |           |
| 18. CBU_1947a |      |         |               | MVKEK     | LK      | --TRRPP | PARSSA       | ILLKY   | TKNLH     | RV     | ----- | RTQ         | I     | KGLR                         | K     | TPMR    | F     | S            |           |   |           |
| 19. CBU_1867a |      |         |               | MVKR      | E       | LK      | --TRRPP      | PARSSA  | ILLKY     | TKNLH  | RV    | -----       | RTQ   | I                            | KGLR  | K       | TPMR  | F            | S         |   |           |
