# Supplementary material for: Identification of novel MITEs (miniature inverted-repeat transposable elements) in Coxiella burnetii: implications for protein and small RNA evolution
Source: PubMed Central journal article supplement (PMC5896051; doi:10.1186/s12864-018-4608-y), 2018-04-11
Supplement: 12864_2018_4608_MOESM9_ESM.pdf [file 12864_2018_4608_MOESM9_ESM.pdf]

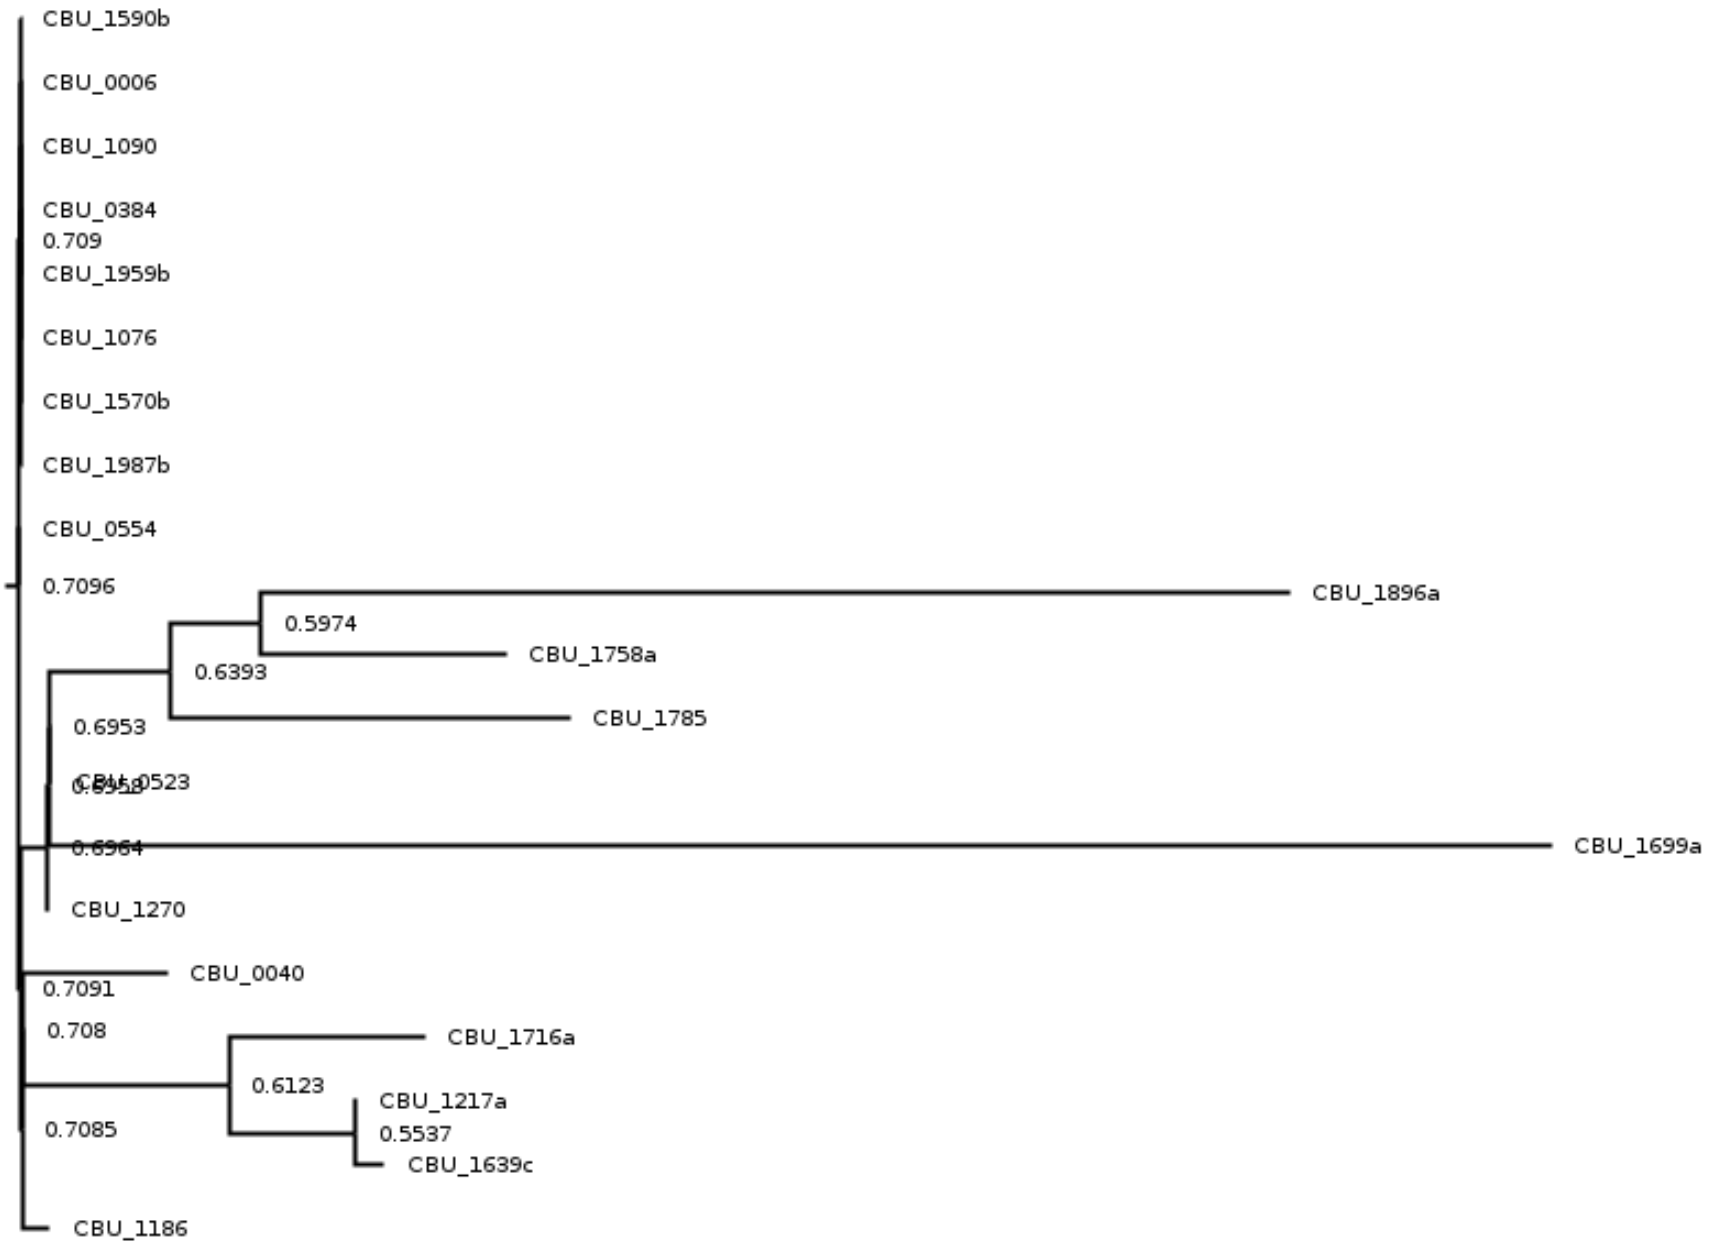

0.08
